# Supplementary material
Source: PubMed Central journal article supplement (PMC7554146)

**Supplemental Table 1.** Summary of select tumor/disease characteristics. Analysis based on a cohort of men and women with invasive breast cancer from the National Cancer Data Base (2004-2015). Data presented as N (%). ER: estrogen receptor. PR: progesterone receptor. HER2: human epidermal growth factor receptor 2.

|                             | <b>All Patients<br/>N=1,664,746<br/>100.0%</b> | <b>Female<br/>N=1,648,070<br/>99.0%</b> | <b>Male<br/>N=16,676<br/>1.0%</b> | <b>P-Value</b> |
|-----------------------------|------------------------------------------------|-----------------------------------------|-----------------------------------|----------------|
| <b>ER Status</b>            |                                                |                                         |                                   | <0.0001        |
| ER+                         | 1292947 (80%)                                  | 1278261 (79.9%)                         | 14,686 (92.1%)                    |                |
| ER-                         | 322,299 (20%)                                  | 321,042 (20.1%)                         | 1,257 (7.9%)                      |                |
| <b>PR Status</b>            |                                                |                                         |                                   | <0.0001        |
| PR+                         | 1118217 (69.6%)                                | 1105028 (69.5%)                         | 13,189 (83.3%)                    |                |
| PR-                         | 488,520 (30.4%)                                | 485,883 (30.5%)                         | 2,637 (16.7%)                     |                |
| <b>HER2 Status</b>          |                                                |                                         |                                   | <0.0001        |
| HER2+                       | 130,223 (14.8%)                                | 129,119 (14.8%)                         | 1,104 (12.5%)                     |                |
| HER2-                       | 750,161 (85.2%)                                | 742,419 (85.2%)                         | 7,742 (87.5%)                     |                |
| <b>Clinical T Stage</b>     |                                                |                                         |                                   |                |
| T1                          | 774,712 (61.8%)                                | 768,621 (61.9%)                         | 6,091 (50.1%)                     | <0.0001        |
| T2                          | 344,836 (27.5%)                                | 340,274 (27.4%)                         | 4,562 (37.5%)                     |                |
| T3                          | 70,249 (5.6%)                                  | 69,749 (5.6%)                           | 500 (4.1%)                        |                |
| T4                          | 63,638 (5.1%)                                  | 62,623 (5%)                             | 1,015 (8.3%)                      |                |
| <b>Clinical N Stage</b>     |                                                |                                         |                                   |                |
| N0                          | 1010729 (80.3%)                                | 1001489 (80.4%)                         | 9,240 (76%)                       | <0.0001        |
| N1                          | 185,275 (14.7%)                                | 183,111 (14.7%)                         | 2,164 (17.8%)                     |                |
| N2                          | 38,893 (3.1%)                                  | 38,392 (3.1%)                           | 501 (4.1%)                        |                |
| N3                          | 23,505 (1.9%)                                  | 23,252 (1.9%)                           | 253 (2.1%)                        |                |
| <b>Pathological T Stage</b> |                                                |                                         |                                   |                |
| T1                          | 832,512 (64.5%)                                | 825,938 (64.7%)                         | 6,574 (50.5%)                     | <0.0001        |
| T2                          | 349,091 (27.1%)                                | 343,981 (26.9%)                         | 5,110 (39.3%)                     |                |
| T3                          | 55,850 (4.3%)                                  | 55,453 (4.3%)                           | 397 (3.1%)                        |                |
| T4                          | 27,790 (2.2%)                                  | 26,949 (2.1%)                           | 841 (6.5%)                        |                |
| T0                          | 24,548 (1.9%)                                  | 24,461 (1.9%)                           | 87 (0.7%)                         |                |
| <b>Pathological N Stage</b> |                                                |                                         |                                   |                |
| N0                          | 862,553 (69.4%)                                | 855,531 (69.6%)                         | 7,022 (56.3%)                     | <0.0001        |
| N1                          | 261,563 (21.1%)                                | 257,981 (21%)                           | 3,582 (28.7%)                     |                |
| N2                          | 78,373 (6.3%)                                  | 77,119 (6.3%)                           | 1,254 (10.1%)                     |                |
| N3                          | 39,592 (3.2%)                                  | 38,978 (3.2%)                           | 614 (4.9%)                        |                |

\*Frequency may not add up to total because of missing values. Percentages are of the total reported and are based on the non-missing cohort of each variable.

**Supplemental Table 2.** Summary of select patient demographics, tumor/disease characteristics, and treatments for NSABP-B06 eligible patients. Analysis based on a cohort of men and women with invasive breast cancer from the National Cancer Data Base (2004-2015). Data presented as N (%) or Median (IQR). IQR: interquartile range. ER: estrogen receptor. PR: progesterone receptor. HER2: human epidermal growth factor receptor 2. HR: hormone receptor. TNBC: triple negative breast cancer.

|                                 | All Patients        | Female               | Male             | P-Value |
|---------------------------------|---------------------|----------------------|------------------|---------|
|                                 | N=716,928<br>(100%) | N=709,818<br>(99.0%) | N=7,110 (1.0%)   |         |
| Follow-up (months)              |                     |                      |                  | <0.001  |
| Median (IQR)                    | 58.9 (36.6-83.9)    | 58.9 (36.6-83.9)     | 56.5 (34.8-81.4) |         |
| Age                             |                     |                      |                  | <0.001  |
| Median (IQR)                    | 61 (52 - 70)        | 61 (52 - 70)         | 66 (57 - 74)     |         |
| Race/Ethnicity                  |                     |                      |                  | <0.001  |
| Hispanic                        | 31,412 (4.6%)       | 31,199 (4.6%)        | 213 (3.2%)       |         |
| Non-Hispanic Black              | 64,151 (9.4%)       | 63,446 (9.4%)        | 705 (10.5%)      |         |
| Non-Hispanic Other              | 26,548 (3.9%)       | 26,384 (3.9%)        | 164 (2.4%)       |         |
| Non-Hispanic White              | 556,815 (82%)       | 551,197 (82%)        | 5,618 (83.9%)    |         |
| Charlson/Deyo Comorbidity Score |                     |                      |                  | <0.001  |
| 0                               | 601,125 (84.3%)     | 595,649 (84.4%)      | 5,476 (77.9%)    |         |
| 1                               | 95,246 (13.4%)      | 93,989 (13.3%)       | 1,257 (17.9%)    |         |
| ≥ 2                             | 16,389 (2.3%)       | 16,094 (2.3%)        | 295 (4.2%)       |         |
| Histology                       |                     |                      |                  | <0.001  |
| Ductal                          | 639,584 (89.2%)     | 632,716 (89.1%)      | 6,868 (96.6%)    |         |
| Lobular                         | 71,001 (9.9%)       | 70,797 (10%)         | 204 (2.9%)       |         |
| Other                           | 6,343 (0.9%)        | 6,305 (0.9%)         | 38 (0.5%)        |         |
| Tumor Size (mm)                 |                     |                      |                  | <0.001  |
| Median (IQR)                    | 15 (9 - 21)         | 15 (9 - 21)          | 19 (13 - 25)     |         |
| Positive LNs                    |                     |                      |                  | <0.001  |
| Median (IQR)                    | 1 (1 - 3)           | 1 (1 - 3)            | 2 (1 - 3)        |         |
| Oncotype Dx                     |                     |                      |                  | 0.11    |
| Median (IQR)                    | 16 (11-22)          | 16 (11-22)           | 16 (8.5 -23.5)   |         |
| Grade                           |                     |                      |                  | <0.001  |
| 1                               | 175,308 (25.6%)     | 174,233 (25.7%)      | 1,075 (15.7%)    |         |
| 2                               | 308,967 (45.1%)     | 305,418 (45%)        | 3,549 (51.8%)    |         |
| 3                               | 201,465 (29.4%)     | 199,235 (29.3%)      | 2,230 (32.5%)    |         |
| Molecular Subtypes by Receptors |                     |                      |                  | <0.001  |

|                                | All Patients        | Female               | Male           | P-Value |
|--------------------------------|---------------------|----------------------|----------------|---------|
|                                | N=716,928<br>(100%) | N=709,818<br>(99.0%) | N=7,110 (1.0%) |         |
| HER2+                          | 53,359 (11.2%)      | 52,853 (11.2%)       | 506 (10.4%)    |         |
| HR+/HER2-                      | 373,215 (78.5%)     | 369,022 (78.4%)      | 4,193 (86.4%)  |         |
| TNBC                           | 48,789 (10.3%)      | 48,635 (10.3%)       | 154 (3.2%)     |         |
| Clinical T Stage               |                     |                      |                | <0.001  |
| T1                             | 546,417 (76.2%)     | 542,040 (76.4%)      | 4,377 (61.6%)  |         |
| T2                             | 170,511 (23.8%)     | 167,778 (23.6%)      | 2,733 (38.4%)  |         |
| Clinical N Stage               |                     |                      |                | <0.001  |
| N0                             | 659,460 (92%)       | 653,319 (92%)        | 6,141 (86.4%)  |         |
| N1                             | 57,468 (8%)         | 56,499 (8%)          | 969 (13.6%)    |         |
| Pathological T Stage           |                     |                      |                | <0.001  |
| T1                             | 454,448 (72.1%)     | 450,818 (72.3%)      | 3,630 (57%)    |         |
| T2                             | 174,289 (27.7%)     | 171,651 (27.5%)      | 2,638 (41.4%)  |         |
| T3                             | 435 (0.1%)          | 430 (0.1%)           | 5 (0.1%)       |         |
| T4                             | 1,043 (0.2%)        | 951 (0.2%)           | 92 (1.4%)      |         |
| Pathological N Stage           |                     |                      |                | <0.001  |
| N0                             | 480,208 (76.4%)     | 476,208 (76.5%)      | 4,000 (63.1%)  |         |
| N1                             | 122,534 (19.5%)     | 120,714 (19.4%)      | 1,820 (28.7%)  |         |
| N2                             | 19,108 (3%)         | 18,755 (3%)          | 353 (5.6%)     |         |
| N3                             | 7,065 (1.1%)        | 6,897 (1.1%)         | 168 (2.6%)     |         |
| Pathological M Stage           |                     |                      |                | 0.9015  |
| M0                             | 716,708 (100%)      | 709,600 (100%)       | 7,108 (100%)   |         |
| M1                             | 220 (0%)            | 218 (0%)             | 2 (0%)         |         |
| Anatomic Stage Groups          |                     |                      |                | <0.001  |
| I                              | 519,547 (72.5%)     | 515,588 (72.6%)      | 3,959 (55.7%)  |         |
| II                             | 197,381 (27.5%)     | 194,230 (27.4%)      | 3,151 (44.3%)  |         |
| Prognostic Stage Group         |                     |                      |                | <0.001  |
| I                              | 577,239 (90%)       | 572,197 (90.1%)      | 5,042 (83.8%)  |         |
| II                             | 60,276 (9.4%)       | 59,321 (9.3%)        | 955 (15.9%)    |         |
| III                            | 3,584 (0.6%)        | 3,563 (0.6%)         | 21 (0.3%)      |         |
| Breast Surgery Type            |                     |                      |                | <0.001  |
| Lumpectomy                     | 431,112 (60.1%)     | 429,794 (60.5%)      | 1,318 (18.5%)  |         |
| Mastectomy                     | 285,816 (39.9%)     | 280,024 (39.5%)      | 5,792 (81.5%)  |         |
| Received Any Radiation Therapy |                     |                      |                | <0.001  |

|                                               | All Patients        | Female               | Male           | P-Value |
|-----------------------------------------------|---------------------|----------------------|----------------|---------|
|                                               | N=716,928<br>(100%) | N=709,818<br>(99.0%) | N=7,110 (1.0%) |         |
| No                                            | 237,340 (33.2%)     | 232,807 (32.9%)      | 4,533 (64.3%)  |         |
| Yes                                           | 476,889 (66.8%)     | 474,369 (67.1%)      | 2,520 (35.7%)  |         |
| Local-Regional Therapy                        |                     |                      |                | <0.001  |
| Mastectomy                                    | 237,340 (33.2%)     | 232,807 (32.9%)      | 4,533 (64.3%)  |         |
| Lumpectomy+Radiation                          | 431,112 (60.4%)     | 429,794 (60.8%)      | 1,318 (18.7%)  |         |
| Mastectomy+Radiation                          | 45,777 (6.4%)       | 44,575 (6.3%)        | 1,202 (17%)    |         |
| Received Any Chemotherapy                     |                     |                      |                | 0.9839  |
| No                                            | 427,897 (61%)       | 423,698 (61%)        | 4,199 (61%)    |         |
| Yes                                           | 273,172 (39%)       | 270,490 (39%)        | 2,682 (39%)    |         |
| Timing of Chemotherapy                        |                     |                      |                | 0.9462  |
| Adjuvant Chemo Only                           | 260,193 (37.8%)     | 257,644 (37.8%)      | 2,549 (37.8%)  |         |
| No Chemo                                      | 427,897 (62.2%)     | 423,698 (62.2%)      | 4,199 (62.2%)  |         |
| Received Endocrine Therapy based on HR status |                     |                      |                | <0.001  |
| Endocrine if HR+                              | 473,206 (66.8%)     | 468,845 (66.9%)      | 4,361 (62.5%)  |         |
| No Endocrine if HR+                           | 131,316 (18.5%)     | 129,023 (18.4%)      | 2,293 (32.9%)  |         |
| Endocrine if HR-                              | 3,492 (0.5%)        | 3,479 (0.5%)         | 13 (0.2%)      |         |
| No Endocrine if HR-                           | 100,091 (14.1%)     | 99,779 (14.2%)       | 312 (4.5%)     |         |
| Year                                          |                     |                      |                | 0.0016  |
| 2004                                          | 21,218 (3%)         | 21,030 (3%)          | 188 (2.6%)     |         |
| 2005                                          | 23,347 (3.3%)       | 23,136 (3.3%)        | 211 (3%)       |         |
| 2006                                          | 25,968 (3.6%)       | 25,709 (3.6%)        | 259 (3.6%)     |         |
| 2007                                          | 33,524 (4.7%)       | 33,210 (4.7%)        | 314 (4.4%)     |         |
| 2008                                          | 57,826 (8.1%)       | 57,297 (8.1%)        | 529 (7.4%)     |         |
| 2009                                          | 68,598 (9.6%)       | 67,975 (9.6%)        | 623 (8.8%)     |         |
| 2010                                          | 75,363 (10.5%)      | 74,629 (10.5%)       | 734 (10.3%)    |         |
| 2011                                          | 79,082 (11%)        | 78,321 (11%)         | 761 (10.7%)    |         |
| 2012                                          | 81,270 (11.3%)      | 80,445 (11.3%)       | 825 (11.6%)    |         |
| 2013                                          | 84,865 (11.8%)      | 83,970 (11.8%)       | 895 (12.6%)    |         |
| 2014                                          | 84,151 (11.7%)      | 83,279 (11.7%)       | 872 (12.3%)    |         |
| 2015                                          | 81,716 (11.4%)      | 80,817 (11.4%)       | 899 (12.6%)    |         |

\*Frequency may not add up to total because of missing values. Percentages are of the total reported and are based on the non-missing cohort of each variable.

**Supplemental Table 3.** Summary of select patient demographics, tumor/disease characteristics, and treatments for CALGB 9343 eligible patients. Analysis based on a cohort of men and women with invasive breast cancer from the National Cancer Data Base (2004-2015). Data presented as N (%) or Median (IQR) unless otherwise specified. IQR: interquartile range. LN: lymph node. PR: progesterone receptor. HER2: human epidermal growth factor receptor 2.

|                                 | All Patients       | Female              | Male             |         |
|---------------------------------|--------------------|---------------------|------------------|---------|
|                                 | N=86,391<br>(100%) | N=86,127<br>(99.7%) | N=264<br>(0.3%)  | P-Value |
| Follow-up (months)              |                    |                     |                  |         |
| Median (IQR)                    | 54.1 (33.8-79.1)   | 54.1 (33.8-79.1)    | 51.9 (33.2-73.8) |         |
| Age                             |                    |                     |                  |         |
| Median (IQR)                    | 75 (72 - 80)       | 75 (72 - 80)        | 75 (72 - 80)     | 0.79    |
| Race/Ethnicity                  |                    |                     |                  |         |
| Hispanic                        | 2,049 (2.5%)       | 2,043 (2.5%)        | 6 (2.4%)         |         |
| Non-Hispanic Black              | 5,000 (6.1%)       | 4,983 (6.1%)        | 17 (6.9%)        |         |
| Non-Hispanic Other              | 1,687 (2.1%)       | 1,684 (2.1%)        | 3 (1.2%)         |         |
| Non-Hispanic White              | 73,412 (89.4%)     | 73,193 (89.4%)      | 219 (89.4%)      |         |
| Charlson/Deyo Comorbidity Score |                    |                     |                  |         |
| 0                               | 68,260 (79.7%)     | 68,048 (79.7%)      | 212 (81.2%)      |         |
| 1                               | 14,614 (17.1%)     | 14,569 (17.1%)      | 45 (17.2%)       |         |
| ≥ 2                             | 2,777 (3.2%)       | 2,773 (3.2%)        | 4 (1.5%)         |         |
| Histology                       |                    |                     |                  |         |
| Ductal                          | 76,095 (88.1%)     | 75,854 (88.1%)      | 241 (91.3%)      |         |
| Lobular                         | 10,182 (11.8%)     | 10,159 (11.8%)      | 23 (8.7%)        |         |
| Other                           | 114 (0.1%)         | 114 (0.1%)          | 0 (0%)           |         |
| Tumor Size (mm)                 |                    |                     |                  |         |
| Median (IQR)                    | 12 (8 - 15)        | 12 (8 - 15)         | 12 (8 - 16)      | 0.57    |
| Positive LNs                    |                    |                     |                  |         |
| Median (IQR)                    | 1 (1 - 2)          | 1 (1 - 2)           | 1 (1 - 1)        | 0.23    |
| Oncotype Dx Score               |                    |                     |                  |         |
| Median (IQR)                    | 15 (10-21)         | 15 (10-21)          | 16 (9-22)        | 0.78    |
| Grade                           |                    |                     |                  |         |
| 1                               | 76,095 (88.1%)     | 75,854 (88.1%)      | 241 (91.3%)      |         |
| 2                               | 10,182 (11.8%)     | 10,159 (11.8%)      | 23 (8.7%)        |         |
| 3                               | 114 (0.1%)         | 114 (0.1%)          | 0 (0%)           |         |
| PR Status                       |                    |                     |                  |         |
| PR+                             | 76,000 (88.3%)     | 75,760 (88.3%)      | 240 (90.9%)      | 0.18    |

|                                | All Patients       | Female              | Male            |         |
|--------------------------------|--------------------|---------------------|-----------------|---------|
|                                | N=86,391<br>(100%) | N=86,127<br>(99.7%) | N=264<br>(0.3%) | P-Value |
| PR-                            | 10,065 (11.7%)     | 10,041 (11.7%)      | 24 (9.1%)       |         |
| HER2 Status                    |                    |                     |                 | 0.36    |
| HER2+                          | 3,728 (5.9%)       | 3,713 (5.9%)        | 15 (7.5%)       |         |
| HER2-                          | 59,140 (94.1%)     | 58,954 (94.1%)      | 186 (92.5%)     |         |
| Pathological T Stage           |                    |                     |                 | 0.67    |
| T1                             | 72,033 (92.9%)     | 71,812 (92.9%)      | 221 (94.8%)     |         |
| T2                             | 5,341 (6.9%)       | 5,329 (6.9%)        | 12 (5.2%)       |         |
| T3                             | 106 (0.1%)         | 106 (0.1%)          | 0 (0%)          |         |
| T4                             | 41 (0.1%)          | 41 (0.1%)           | 0 (0%)          |         |
| Pathological N Stage           |                    |                     |                 | 0.09    |
| N0                             | 63,643 (89.7%)     | 63,460 (89.8%)      | 183 (85.1%)     |         |
| N1                             | 6,736 (9.5%)       | 6,705 (9.5%)        | 31 (14.4%)      |         |
| N2                             | 424 (0.6%)         | 423 (0.6%)          | 1 (0.5%)        |         |
| N3                             | 113 (0.2%)         | 113 (0.2%)          | 0 (0%)          |         |
| N0                             | 63,643 (89.7%)     | 63,460 (89.8%)      | 183 (85.1%)     |         |
| Pathological M Stage           |                    |                     |                 | 0.84    |
| M0                             | 86,377 (100%)      | 86,113 (100%)       | 264 (100%)      |         |
| M1                             | 14 (0%)            | 14 (0%)             | 0 (0%)          |         |
| Had LNs Examined               |                    |                     |                 | 0.81    |
| Yes                            | 75,617 (87.6%)     | 75,387 (87.6%)      | 230 (87.1%)     |         |
| No or unknown                  | 10,694 (12.4%)     | 10,660 (12.4%)      | 34 (12.9%)      |         |
| Extent of Axillary Surgery     |                    |                     |                 | 0.94    |
| [1-5] LNs                      | 65,644 (87.5%)     | 65,447 (87.5%)      | 197 (87.2%)     |         |
| [6-9] LNs                      | 5,236 (7%)         | 5,219 (7%)          | 17 (7.5%)       |         |
| ≥ 10 LNs                       | 4,149 (5.5%)       | 4,137 (5.5%)        | 12 (5.3%)       |         |
| Received Any Radiation Therapy |                    |                     |                 | 0.94    |
| No                             | 23,717 (27.5%)     | 23,644 (27.5%)      | 73 (27.7%)      |         |
| Yes                            | 62,674 (72.5%)     | 62,483 (72.5%)      | 191 (72.3%)     |         |
| Local-Regional Therapy         |                    |                     |                 | 0.94    |
| Lumpectomy                     | 23,717 (27.5%)     | 23,644 (27.5%)      | 73 (27.7%)      |         |
| Lumpectomy+Radiation           | 62,674 (72.5%)     | 62,483 (72.5%)      | 191 (72.3%)     |         |
| Received Any Chemotherapy      |                    |                     |                 | 0.006   |
| No                             | 79,104 (93.3%)     | 78,876 (93.3%)      | 228 (89.1%)     |         |

|                               | <b>All Patients</b>              | <b>Female</b>                     | <b>Male</b>                   |                |
|-------------------------------|----------------------------------|-----------------------------------|-------------------------------|----------------|
|                               | <b>N=86,391</b><br><b>(100%)</b> | <b>N=86,127</b><br><b>(99.7%)</b> | <b>N=264</b><br><b>(0.3%)</b> | <b>P-Value</b> |
| Yes                           | 5,651 (6.7%)                     | 5,623 (6.7%)                      | 28 (10.9%)                    |                |
| <b>Timing of Chemotherapy</b> |                                  |                                   |                               | <b>0.005</b>   |
| Adjuvant Chemo Only           | 5,563 (6.6%)                     | 5,535 (6.6%)                      | 28 (10.9%)                    |                |
| No Chemo                      | 79,104 (93.4%)                   | 78,876 (93.4%)                    | 228 (89.1%)                   |                |
| <b>Year</b>                   |                                  |                                   |                               | <b>0.37</b>    |
| 2004                          | 1,833 (2.1%)                     | 1,831 (2.1%)                      | 2 (0.8%)                      |                |
| 2005                          | 2,075 (2.4%)                     | 2,068 (2.4%)                      | 7 (2.7%)                      |                |
| 2006                          | 2,424 (2.8%)                     | 2,413 (2.8%)                      | 11 (4.2%)                     |                |
| 2007                          | 3,155 (3.7%)                     | 3,150 (3.7%)                      | 5 (1.9%)                      |                |
| 2008                          | 5,801 (6.7%)                     | 5,785 (6.7%)                      | 16 (6.1%)                     |                |
| 2009                          | 7,150 (8.3%)                     | 7,130 (8.3%)                      | 20 (7.6%)                     |                |
| 2010                          | 8,196 (9.5%)                     | 8,168 (9.5%)                      | 28 (10.6%)                    |                |
| 2011                          | 9,225 (10.7%)                    | 9,193 (10.7%)                     | 32 (12.1%)                    |                |
| 2012                          | 10,023 (11.6%)                   | 9,991 (11.6%)                     | 32 (12.1%)                    |                |
| 2013                          | 11,429 (13.2%)                   | 11,403 (13.2%)                    | 26 (9.8%)                     |                |
| 2014                          | 12,236 (14.2%)                   | 12,199 (14.2%)                    | 37 (14%)                      |                |
| 2015                          | 12,844 (14.9%)                   | 12,796 (14.9%)                    | 48 (18.2%)                    |                |

\*Frequency may not add up to total because of missing values. Percentages are of the total reported and are based on the non-missing cohort of each variable.

**Supplemental Table 4.** Summary of select patient demographics, tumor/disease characteristics, and treatments for ACOSOG Z011 eligible patients. Analysis based on a cohort of men and women with invasive breast cancer from the National Cancer Data Base (2004-2015). Data presented as N (%) or Median (IQR). IQR: interquartile range. HER2: human epidermal growth factor receptor 2. HR: hormone receptor. TNBC: triple negative breast cancer. LN: lymph node.

|                                 | All Patients     | Female           | Male             | P-Value |
|---------------------------------|------------------|------------------|------------------|---------|
|                                 | N=46,769 (100%)  | N=46,596 (99.6%) | N=173 (0.4%)     |         |
| Follow-up (months)              |                  |                  |                  |         |
| Median (IQR)                    | 56.1 (35.1-81.6) | 56.0 (35.1-81.6) | 54.0 (34.5-75.9) |         |
| Age                             |                  |                  |                  |         |
| Median (IQR)                    | 61 (52 - 69)     | 61 (52 - 69)     | 61 (52 - 70)     | 0.82    |
| Race/Ethnicity                  |                  |                  |                  |         |
| Hispanic                        | 2,243 (5%)       | 2,239 (5%)       | 4 (2.5%)         |         |
| Non-Hispanic Black              | 4,563 (10.3%)    | 4,552 (10.3%)    | 11 (6.9%)        |         |
| Non-Hispanic Other              | 1,634 (3.7%)     | 1,628 (3.7%)     | 6 (3.8%)         |         |
| Non-Hispanic White              | 36,063 (81%)     | 35,925 (81%)     | 138 (86.8%)      |         |
| Charlson/Deyo Comorbidity Score |                  |                  |                  |         |
| 0                               | 39,272 (84.4%)   | 39,137 (84.5%)   | 135 (78.5%)      |         |
| 1                               | 6,093 (13.1%)    | 6,063 (13.1%)    | 30 (17.4%)       |         |
| ≥ 2                             | 1,145 (2.5%)     | 1,138 (2.5%)     | 7 (4.1%)         |         |
| Histology                       |                  |                  |                  |         |
| Ductal                          | 42,701 (91.3%)   | 42,538 (91.3%)   | 163 (94.2%)      |         |
| Lobular                         | 3,876 (8.3%)     | 3,867 (8.3%)     | 9 (5.2%)         |         |
| Other                           | 192 (0.4%)       | 191 (0.4%)       | 1 (0.6%)         |         |
| Tumor Size (mm)                 |                  |                  |                  |         |
| Median (IQR)                    | 17 (12 - 23)     | 17 (12 - 23)     | 17 (13 - 22)     | 0.77    |
| Oncotype Dx Recurrence Score    |                  |                  |                  |         |
| Median (IQR)                    | 15 (11-20)       | 15 (11-20)       | 17 (12-24)       | 0.09    |
| Grade                           |                  |                  |                  |         |
| 1                               | 9,887 (21.9%)    | 9,861 (21.9%)    | 26 (15.9%)       |         |
| 2                               | 22,231 (49.3%)   | 22,141 (49.3%)   | 90 (54.9%)       |         |
| 3                               | 12,978 (28.8%)   | 12,930 (28.8%)   | 48 (29.3%)       |         |
| Molecular Subtypes by Receptors |                  |                  |                  |         |
| HER2+                           | 3,266 (9.9%)     | 3,255 (9.9%)     | 11 (8.3%)        |         |
| HR+/HER2-                       | 27,311 (83.1%)   | 27,195 (83%)     | 116 (87.2%)      |         |
| TNBC                            | 2,305 (7%)       | 2,299 (7%)       | 6 (4.5%)         |         |



|                                               | All Patients    | Female           | Male         | P-Value |
|-----------------------------------------------|-----------------|------------------|--------------|---------|
|                                               | N=46,769 (100%) | N=46,596 (99.6%) | N=173 (0.4%) |         |
| Clinical T Stage                              |                 |                  |              | 0.24    |
| T1                                            | 34,794 (74.4%)  | 34,672 (74.4%)   | 122 (70.5%)  |         |
| T2                                            | 11,975 (25.6%)  | 11,924 (25.6%)   | 51 (29.5%)   |         |
| Pathological T Stage                          |                 |                  |              | 0.45    |
| T1                                            | 27,707 (66.1%)  | 27,604 (66.1%)   | 103 (62.8%)  |         |
| T2                                            | 13,838 (33%)    | 13,777 (33%)     | 61 (37.2%)   |         |
| T3                                            | 329 (0.8%)      | 329 (0.8%)       | 0 (0%)       |         |
| T4                                            | 57 (0.1%)       | 57 (0.1%)        | 0 (0%)       |         |
| Pathological N Stage                          |                 |                  |              | 0.25    |
| N0                                            | 836 (2%)        | 831 (2%)         | 5 (3%)       |         |
| N1                                            | 40,957 (97.8%)  | 40,799 (97.8%)   | 158 (96.3%)  |         |
| N2                                            | 52 (0.1%)       | 51 (0.1%)        | 1 (0.6%)     |         |
| N3                                            | 18 (0%)         | 18 (0%)          | 0 (0%)       |         |
| Anatomic Stage Groups                         |                 |                  |              | 0.55    |
| I                                             | 34,664 (74.1%)  | 34,542 (74.1%)   | 122 (70.5%)  |         |
| II                                            | 11,845 (25.3%)  | 11,795 (25.3%)   | 50 (28.9%)   |         |
| IV                                            | 260 (0.6%)      | 259 (0.6%)       | 1 (0.6%)     |         |
| Extent of Axillary Surgery                    |                 |                  |              | 0.18    |
| [1-5] LNs                                     | 30,456 (65.1%)  | 30,335 (65.1%)   | 121 (69.9%)  |         |
| ≥ 10 LNs                                      | 16,313 (34.9%)  | 16,261 (34.9%)   | 52 (30.1%)   |         |
| Received Radiation Therapy                    |                 |                  |              | <0.001  |
| No                                            | 5,170 (11.1%)   | 5,135 (11.1%)    | 35 (20.5%)   |         |
| Yes                                           | 41,417 (88.9%)  | 41,281 (88.9%)   | 136 (79.5%)  |         |
| Local-Regional Therapy                        |                 |                  |              | <0.001  |
| Lumpectomy                                    | 5,170 (11.1%)   | 5,135 (11.1%)    | 35 (20.5%)   |         |
| Lumpectomy+Radiation                          | 41,417 (88.9%)  | 41,281 (88.9%)   | 136 (79.5%)  |         |
| Received Any Chemotherapy                     |                 |                  |              | 0.97    |
| No                                            | 19,074 (41.5%)  | 19,004 (41.5%)   | 70 (41.7%)   |         |
| Yes                                           | 26,844 (58.5%)  | 26,746 (58.5%)   | 98 (58.3%)   |         |
| Timing of Chemotherapy                        |                 |                  |              | 0.96    |
| Adjuvant Chemo Only                           | 25,547 (57.3%)  | 25,454 (57.3%)   | 93 (57.1%)   |         |
| No Chemo                                      | 19,074 (42.7%)  | 19,004 (42.7%)   | 70 (42.9%)   |         |
| Received Endocrine Therapy based on HR status |                 |                  |              | 0.001   |

|                     | All Patients    | Female           | Male         |         |
|---------------------|-----------------|------------------|--------------|---------|
|                     | N=46,769 (100%) | N=46,596 (99.6%) | N=173 (0.4%) | P-Value |
| Endocrine if HR+    | 34,264 (73.8%)  | 34,149 (73.8%)   | 115 (67.3%)  |         |
| No Endocrine if HR+ | 7,152 (15.4%)   | 7,108 (15.4%)    | 44 (25.7%)   |         |
| Endocrine if HR-    | 160 (0.3%)      | 160 (0.3%)       | 0 (0%)       |         |
| No Endocrine HR-    | 4,845 (10.4%)   | 4,833 (10.4%)    | 12 (7%)      |         |
| Year                |                 |                  |              | 0.40    |
| 2004                | 1,335 (2.9%)    | 1,330 (2.9%)     | 5 (2.9%)     |         |
| 2005                | 1,421 (3%)      | 1,419 (3%)       | 2 (1.2%)     |         |
| 2006                | 1,534 (3.3%)    | 1,530 (3.3%)     | 4 (2.3%)     |         |
| 2007                | 1,832 (3.9%)    | 1,826 (3.9%)     | 6 (3.5%)     |         |
| 2008                | 3,301 (7.1%)    | 3,289 (7.1%)     | 12 (6.9%)    |         |
| 2009                | 4,008 (8.6%)    | 3,999 (8.6%)     | 9 (5.2%)     |         |
| 2010                | 4,427 (9.5%)    | 4,410 (9.5%)     | 17 (9.8%)    |         |
| 2011                | 5,080 (10.9%)   | 5,056 (10.9%)    | 24 (13.9%)   |         |
| 2012                | 5,382 (11.5%)   | 5,358 (11.5%)    | 24 (13.9%)   |         |
| 2013                | 5,607 (12%)     | 5,588 (12%)      | 19 (11%)     |         |
| 2014                | 6,241 (13.3%)   | 6,223 (13.4%)    | 18 (10.4%)   |         |
| 2015                | 6,601 (14.1%)   | 6,568 (14.1%)    | 33 (19.1%)   |         |

\*Frequency may not add up to total because of missing values. Percentages are of the total reported and are based on the non-missing cohort of each variable.

**Supplemental Figure 1.** Patient selection diagram based on data from the National Cancer Database (NCDB) 2004-2015 dataset, applying the defined inclusion and exclusion criteria. WHO: World Health Organization.

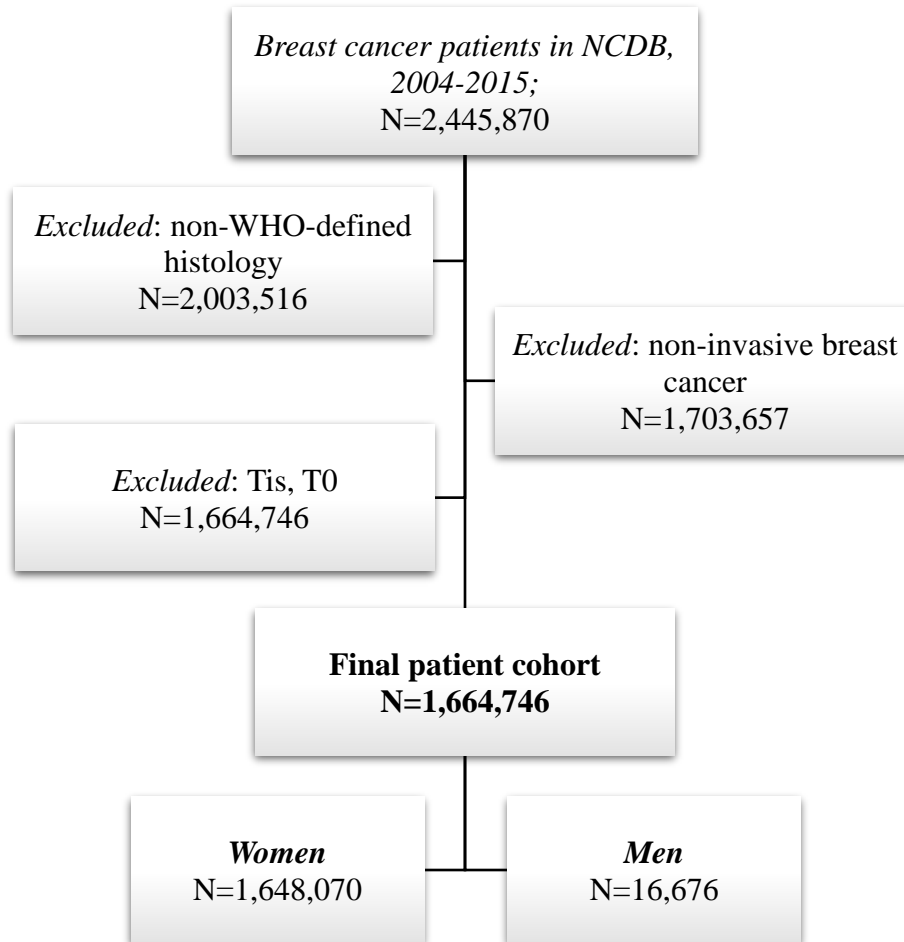

**Supplemental Figure 2.** Unadjusted overall survival stratified by clinical anatomic stage and gender; (2A) Stage I, (2B) Stage II, (2C) Stage III, (2D) Stage IV. Analysis based on a cohort of men and women with invasive breast cancer from the National Cancer Data Base (2004-2015).

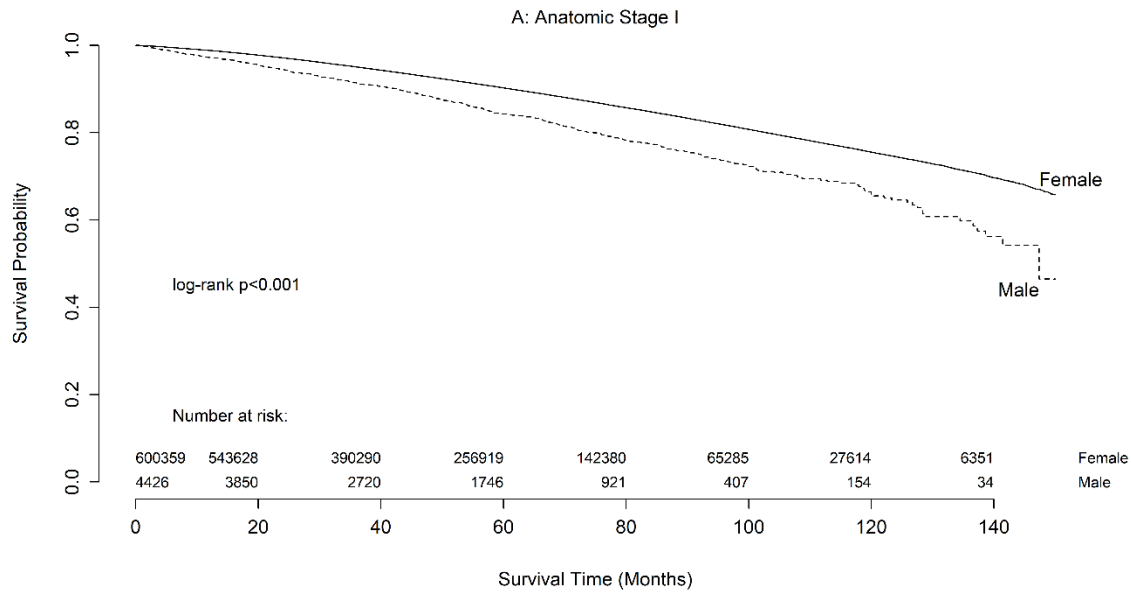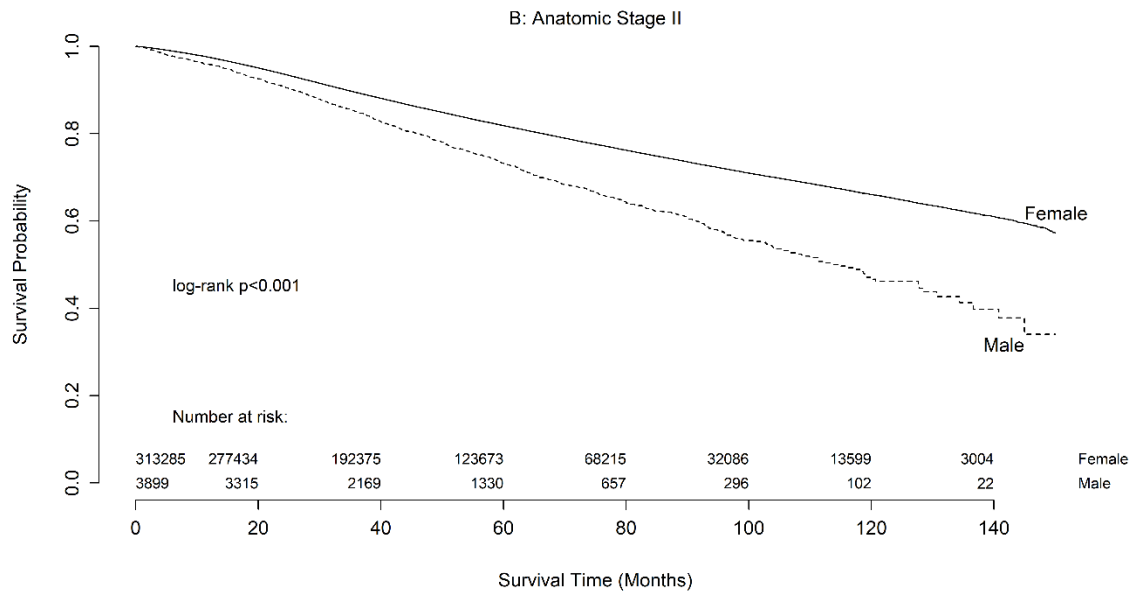

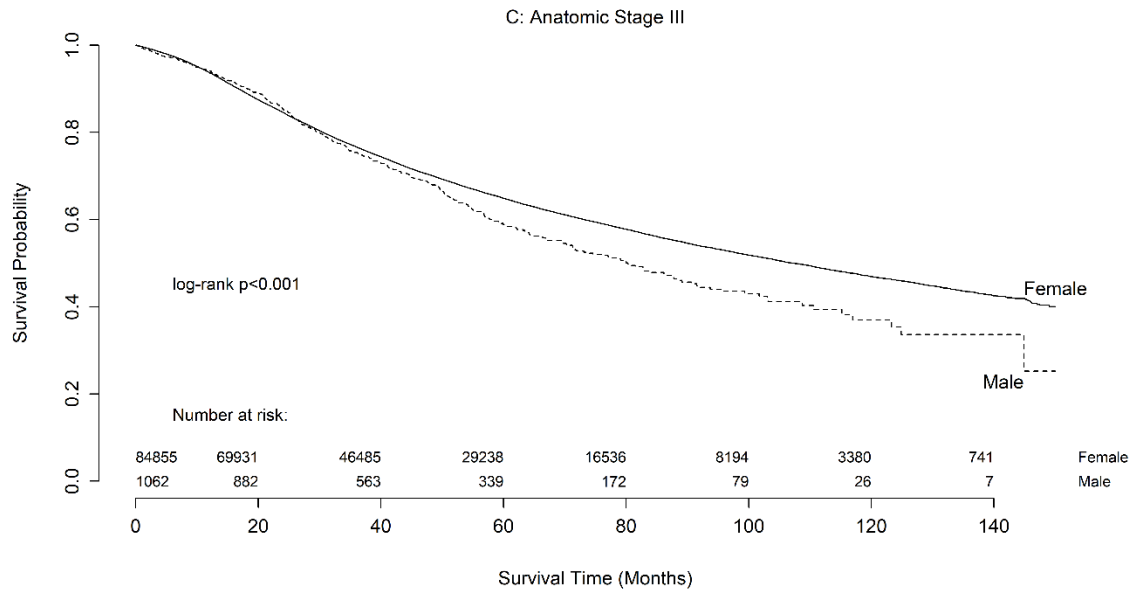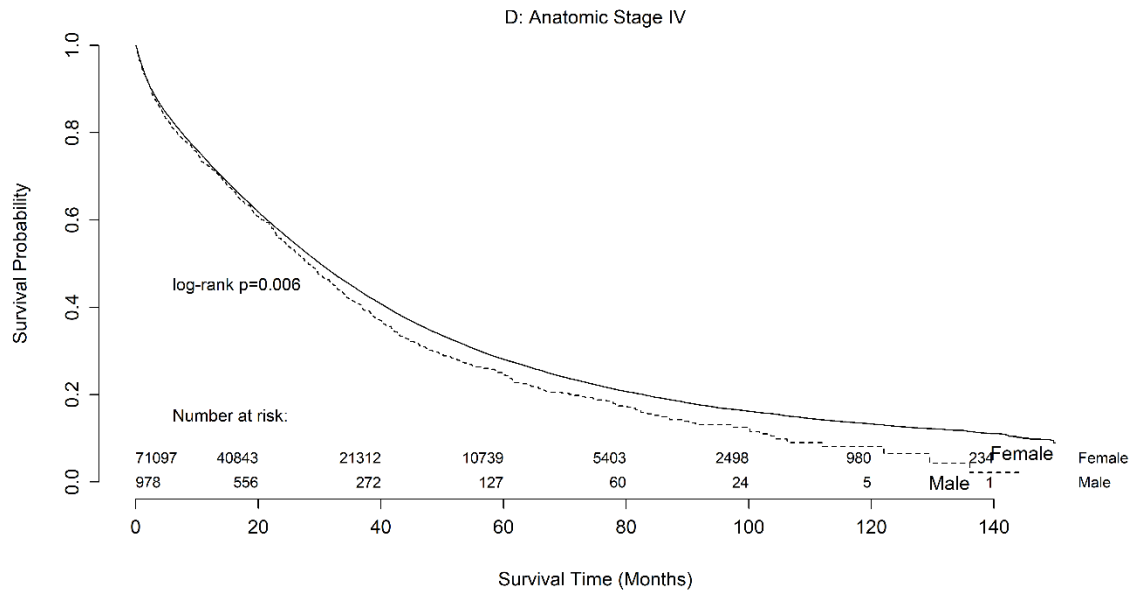

**Supplemental Figure 3.** Unadjusted overall survival stratified by clinical prognostic stage and gender; (3A) Stage I, (3B) Stage II, (3C) Stage III, (3D) Stage IV. Analysis based on a cohort of men and women with invasive breast cancer from the National Cancer Data Base (2004-2015).

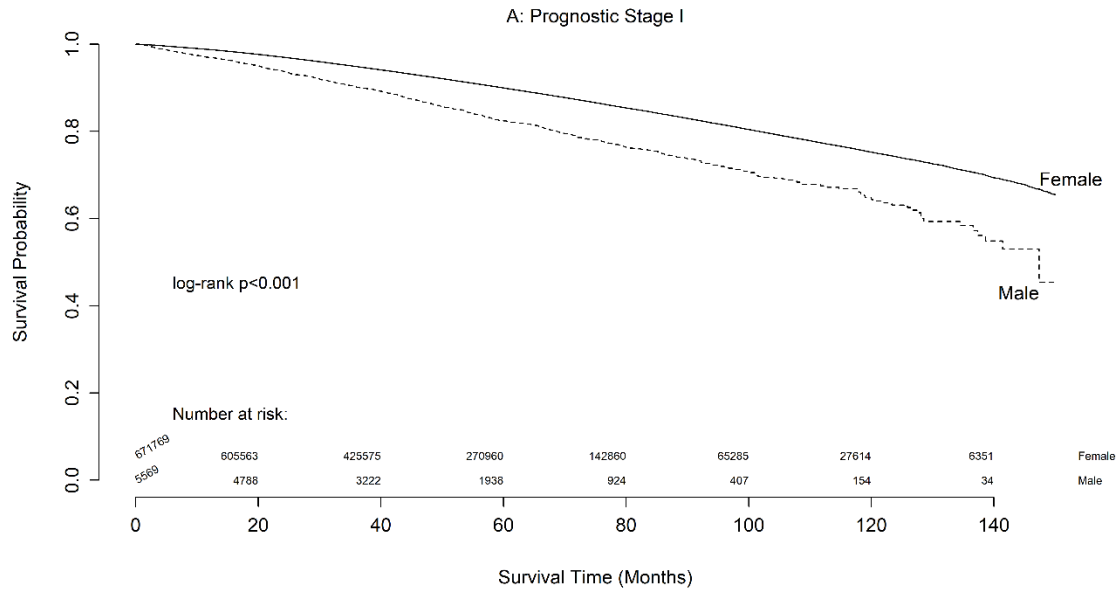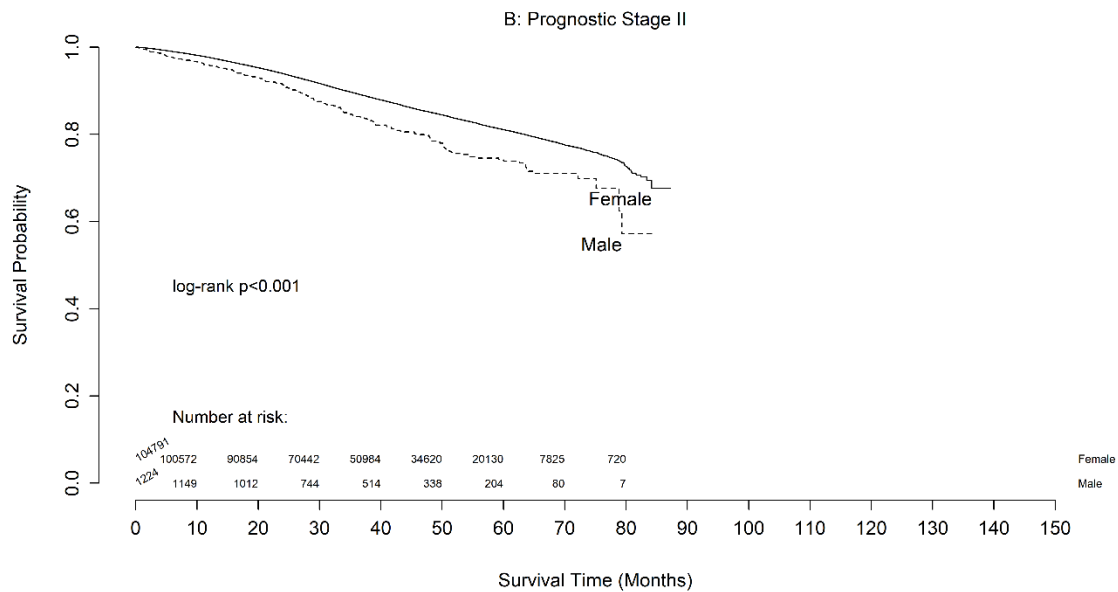

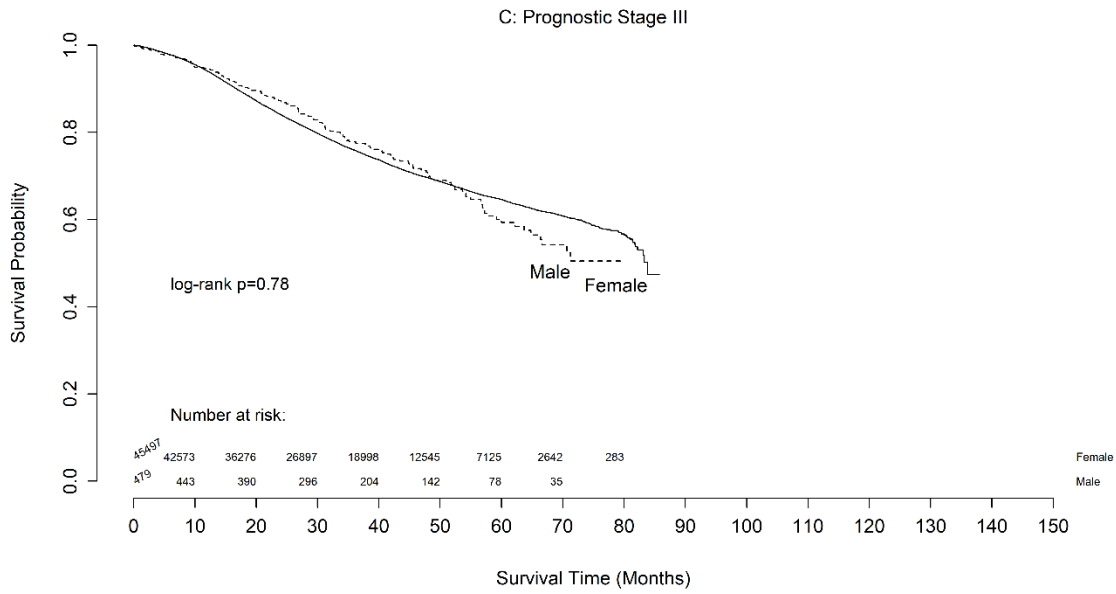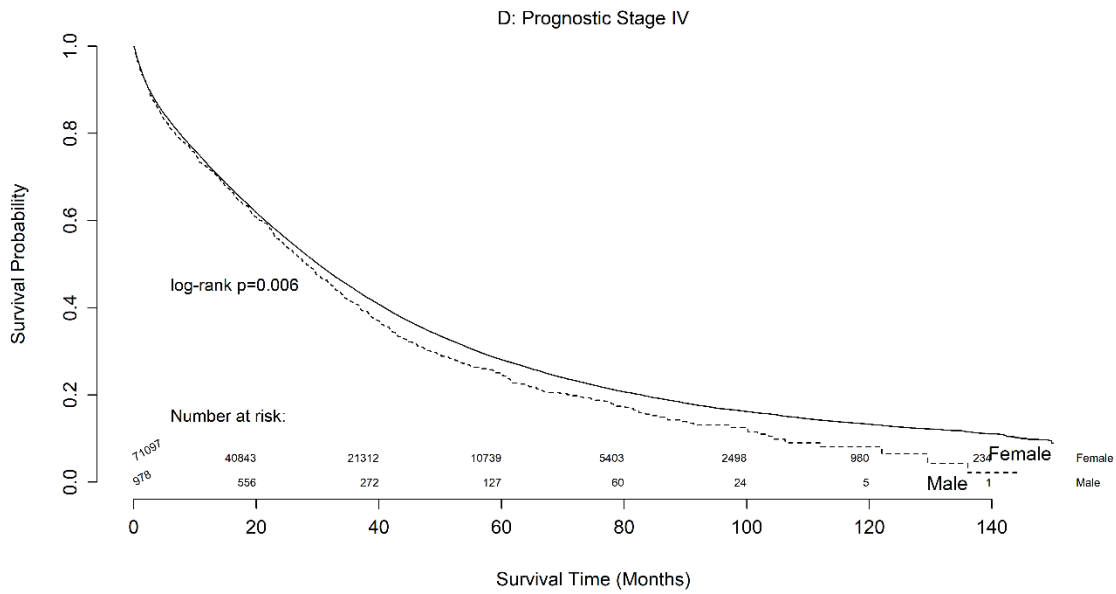

Supplement: NIHMS1619865-supplement-Supplemental_data.pdf [file NIHMS1619865-supplement-Supplemental_data.pdf]
